# Supplementary material
Source: MDPI journal article supplement (https://www.mdpi.com/2311-5637/9/3/269)
Supplement: s1 [file s1]

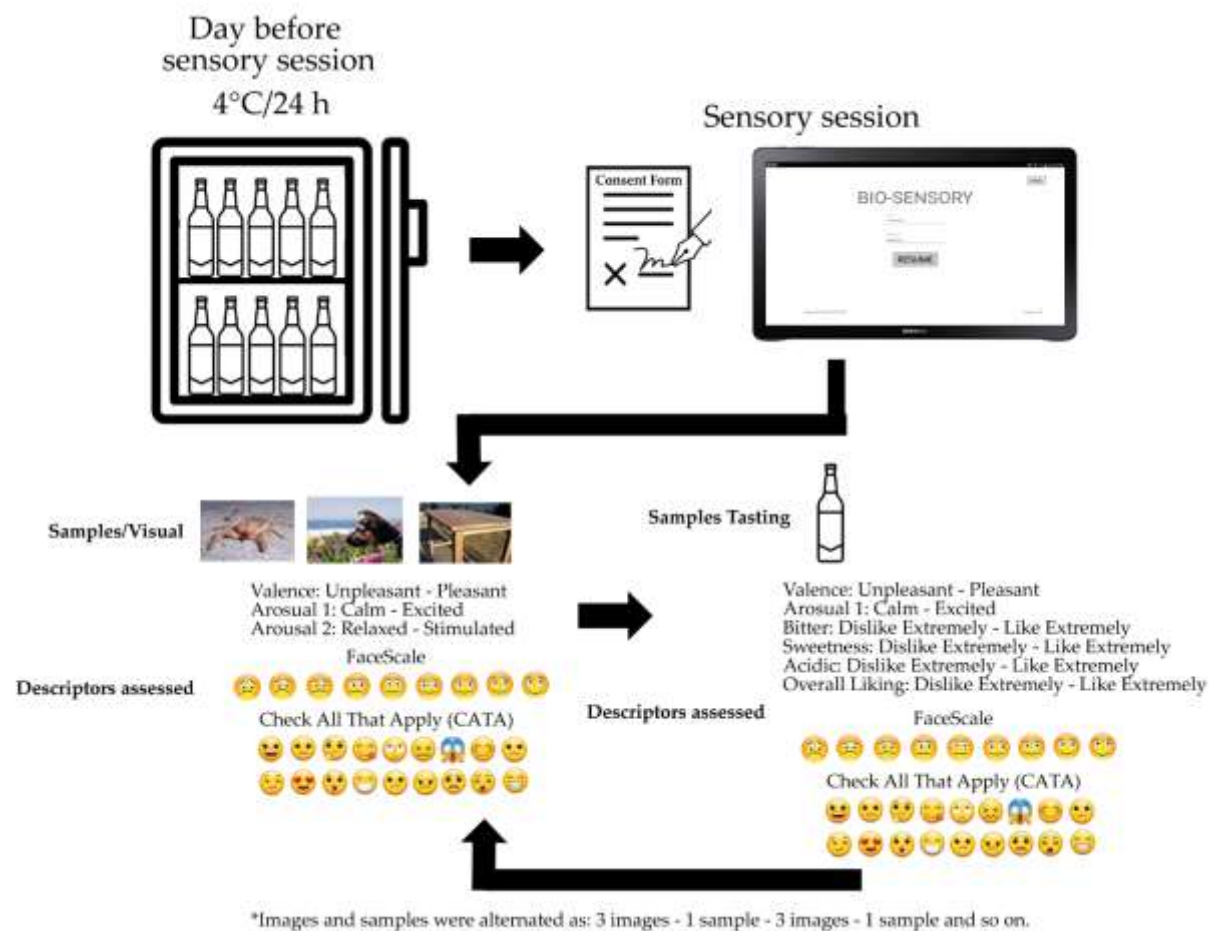

**Figure S1.** Diagram showing the flow of the sensory session from the previous day for sample storage, along with samples and descriptors assessed. Specific beer samples used are shown in Table 1 in the manuscript.

**Table S1.** Results from multivariate analysis of variance using sensory self-reported responses and biometrics.

| <b>Lambda</b> | <b>F-value</b> | <b>Degrees of Freedom<br/>Model</b> | <b>Degrees of Freedom<br/>Error</b> | <b>P-value</b> |
|---------------|----------------|-------------------------------------|-------------------------------------|----------------|
| 0.68          | 1.34           | 115                                 | 1870                                | 0.011          |

**Table S2.** Details of the ANOVA of the self-reported responses from the sensory session. Abbreviations: AFaceScale: FaceScale from aroma; TFaceScale: FaceScale from taste.

| <b>Source</b>             |                  | <b>Aroma</b> | <b>AFaceScale</b> | <b>Bitter</b> | <b>Sweetness</b> | <b>Acidic</b> | <b>TFaceScale</b> | <b>Valence</b> | <b>Overall Liking</b> |
|---------------------------|------------------|--------------|-------------------|---------------|------------------|---------------|-------------------|----------------|-----------------------|
| <b>Degrees of freedom</b> | <b>Model</b>     | 5            | 5                 | 5             | 5                | 5             | 5                 | 5              | 5                     |
|                           | <b>Error</b>     | 432          | 432               | 432           | 432              | 432           | 432               | 432            | 432                   |
|                           | <b>Corrected</b> | 437          | 437               | 437           | 437              | 437           | 437               | 437            | 437                   |
| <b>Sum of Squares</b>     | <b>Model</b>     | 204.79       | 11327.37          | 451.88        | 261.9            | 272.82        | 12037.68          | 512.71         | 383.48                |
|                           | <b>Error</b>     | 6164.24      | 306147.26         | 8127.98       | 6577.73          | 6988.27       | 353355.78         | 7643.18        | 7367.57               |
|                           | <b>Corrected</b> | 6369.03      | 317474.63         | 8579.85       | 6839.63          | 7261.09       | 365393.46         | 8155.89        | 7751.05               |
| <b>Mean Squares</b>       | <b>Model</b>     | 40.96        | 2265.47           | 90.38         | 52.38            | 54.56         | 2407.54           | 102.54         | 76.7                  |
|                           | <b>Error</b>     | 14.27        | 708.67            | 18.81         | 15.23            | 16.18         | 817.95            | 17.69          | 17.05                 |
| <b>F-value</b>            |                  | 2.87         | 3.2               | 4.8           | 3.44             | 3.37          | 2.94              | 5.8            | 4.5                   |
| <b>p-value</b>            |                  | 0.020        | 0.010             | 0.000         | 0.000            | 0.010         | 0.010             | 0.000          | 0.000                 |
